# Supplementary material for: Biochemical and Spectroscopic Characterization of a Recombinant Laccase from Thermoalkaliphilic Bacillus sp. FNT with Potential for Degradation of Polycyclic Aromatic Hydrocarbons (PAHs)
Source: MDPI journal article supplement (doi:10.3390/catal13040763), 2023-04-17
Supplement: s1 [file s1]

## Supplementary Materials

# Biochemical and Spectroscopic Characterization of a Recombinant Laccase from Thermoalkaliphilic *Bacillus* sp. FNT with Potential for Degradation of Polycyclic Aromatic Hydrocarbons (PAHs)

Constanza Bueno-Nieto <sup>2</sup>, Rodrigo Cortés-Antiquera <sup>1,2</sup>, Giannina Espina <sup>2,\*</sup>, Joaquín Atalah <sup>2</sup>,  
Javiera Villanueva <sup>1,2</sup>, Carolina Aliaga <sup>1</sup>, Gustavo E. Zuñiga <sup>1</sup> and Jenny M. Blamey <sup>1,2,\*</sup>

<sup>1</sup> Facultad de Química y Biología, Universidad de Santiago de Chile, Alameda 3363, Santiago 9170022, Chile

<sup>2</sup> Fundación Biociencia, José Domingo Cañas 2280, Santiago 7750132, Chile; constanza.bueno@ug.uchile.cl (C.B.-N.)

\* Correspondence: jblamey@bioscience.cl (J.M.B.); gspina@bioscience.cl (G.E.)

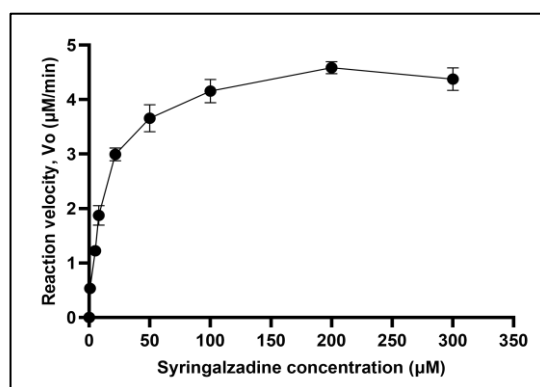

**Figure S1.** Michaelis–Menten plot of FNTL enzyme. Initial velocity for laccase activity using syringaldazine substrate at different concentrations was spectrophotometrically measured at 530 nm. Assays were conducted in triplicate at 70 °C and pH 6.0.

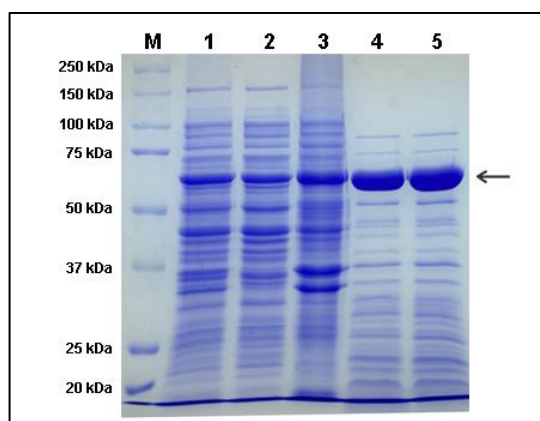

**Figure S2.** Electrophoretic analysis of the heterologous overexpression and partial purification of FNTL. Lane M: Molecular weight marker (Biorad Precision Plus Protein™ Kaleidoscope™ pre-stained protein standard). Lane 1: *E. coli* BL21 lysate (total fraction); Lane 2: cell-free extract (soluble fraction). Lane 3: inclusion bodies solubilized with 8 M urea (insoluble fraction); Lane 4: partial purification by heat treatment at 85 °C for 5 min. Lane 5: concentrated partially purified FNTL. The protein concentration loaded in each well is 15 μg and the band corresponding to FNTL is highlighted by an arrow.
